# Supplementary material
Source: Copernicus journal article supplement (doi:10.5194/egusphere-2026-2711)
Supplement: Supplementary file 1 [file supplementarytable1.pdf › supplementarytable1.pdf]

**Supplementary table 1. Event-scale SM metrics at each location and depth during the wet period, comparing flood events and non-flow events. Data are presented as mean  $\pm$  standard deviation. Significance is indicated as follows: \*\*\* $p$  < 0.001, \*\* $p$  < 0.01, \* $p$  < 0.05. “Not significant” indicates  $p \geq 0.05$ .**

| Metric            | Location                                          | Flood events    | Non-flow events | Significance    |
|-------------------|---------------------------------------------------|-----------------|-----------------|-----------------|
| Antecedent SM (%) | High-connectivity low-gradient hillslope (10 cm)  | 26.2 $\pm$ 2.1  | 22.7 $\pm$ 3.3  | ***             |
|                   | High-connectivity high-gradient hillslope (10 cm) | 14.2 $\pm$ 2.2  | 12.6 $\pm$ 2.8  | Not significant |
|                   | High-connectivity upslope-edge terrace 1 (10 cm)  | 39.7 $\pm$ 2.2  | 37 $\pm$ 3      | ***             |
|                   | High-connectivity upslope-edge terrace 2 (10 cm)  | 30 $\pm$ 2.1    | 26.9 $\pm$ 4    | *               |
|                   | Low-connectivity mid-terrace (10 cm)              | 33.1 $\pm$ 1.5  | 29 $\pm$ 4.3    | **              |
|                   | Collapsed wall-adjacent terrace (10 cm)           | 21.9 $\pm$ 1    | 19.7 $\pm$ 2.3  | **              |
|                   | Collapsed wall-adjacent terrace (50 cm)           | 31.4 $\pm$ 2    | 28.5 $\pm$ 3.1  | **              |
|                   | Intact wall-adjacent terrace (10 cm)              | 26.9 $\pm$ 2.2  | 23.5 $\pm$ 3.5  | **              |
|                   | Intact wall-adjacent terrace (50 cm)              | 30.1 $\pm$ 3.1  | 27.2 $\pm$ 4    | *               |
|                   | Disconnected mid-terrace (10 cm)                  | 22.2 $\pm$ 2.8  | 20.5 $\pm$ 3.1  | *               |
|                   | Disconnected mid-terrace (50 cm)                  | 28.7 $\pm$ 1.9  | 25.8 $\pm$ 3.3  | **              |
| Average SM (%)    | High-connectivity low-gradient hillslope (10 cm)  | 31 $\pm$ 3.5    | 25.1 $\pm$ 3.4  | ***             |
|                   | High-connectivity high-gradient hillslope (10 cm) | 18.6 $\pm$ 2.7  | 14 $\pm$ 3.7    | ***             |
|                   | High-connectivity upslope-edge terrace 1 (10 cm)  | 43.2 $\pm$ 1.5  | 39.4 $\pm$ 3.6  | ***             |
|                   | High-connectivity upslope-edge terrace 2 (10 cm)  | 34.2 $\pm$ 3.1  | 29.4 $\pm$ 4.5  | ***             |
|                   | Low-connectivity mid-terrace (10 cm)              | 38.2 $\pm$ 2.6  | 31.4 $\pm$ 5    | ***             |
|                   | Collapsed wall-adjacent terrace (10 cm)           | 24.5 $\pm$ 1.9  | 20.7 $\pm$ 2.6  | ***             |
|                   | Collapsed wall-adjacent terrace (50 cm)           | 34.7 $\pm$ 2.4  | 29.8 $\pm$ 3.6  | ***             |
|                   | Intact wall-adjacent terrace (10 cm)              | 30.3 $\pm$ 2.1  | 25.2 $\pm$ 3.6  | ***             |
|                   | Intact wall-adjacent terrace (50 cm)              | 33.3 $\pm$ 2.5  | 27.9 $\pm$ 4.2  | ***             |
|                   | Disconnected mid-terrace (10 cm)                  | 23 $\pm$ 2.8    | 20.8 $\pm$ 3.2  | **              |
|                   | Disconnected mid-terrace (50 cm)                  | 31.1 $\pm$ 2.4  | 26.3 $\pm$ 3.4  | ***             |
| Maximum SM (%)    | High-connectivity low-gradient hillslope (10 cm)  | 41.1 $\pm$ 6.9  | 29.3 $\pm$ 6    | ***             |
|                   | High-connectivity high-gradient hillslope (10 cm) | 34.3 $\pm$ 10.9 | 17.6 $\pm$ 7.8  | ***             |
|                   | High-connectivity upslope-edge terrace 1 (10 cm)  | 44.7 $\pm$ 1.1  | 41.6 $\pm$ 4.3  | **              |
|                   | High-connectivity upslope-edge terrace 2 (10 cm)  | 42.4 $\pm$ 6.2  | 33.2 $\pm$ 7.7  | ***             |
|                   | Low-connectivity mid-terrace (10 cm)              | 44.2 $\pm$ 3    | 35.2 $\pm$ 7.9  | ***             |
|                   | Collapsed wall-adjacent terrace (10 cm)           | 30.3 $\pm$ 6.2  | 21.9 $\pm$ 3.5  | ***             |
|                   | Collapsed wall-adjacent terrace (50 cm)           | 39.2 $\pm$ 2.6  | 31.9 $\pm$ 5.6  | ***             |
|                   | Intact wall-adjacent terrace (10 cm)              | 35.9 $\pm$ 2.1  | 28 $\pm$ 5.3    | ***             |
|                   | Intact wall-adjacent terrace (50 cm)              | 38.1 $\pm$ 2.7  | 29.5 $\pm$ 5.5  | ***             |
|                   | Disconnected mid-terrace (10 cm)                  | 24.2 $\pm$ 3.1  | 21.3 $\pm$ 3.4  | **              |
|                   | Disconnected mid-terrace (50 cm)                  | 35.3 $\pm$ 5.3  | 27.5 $\pm$ 4.7  | ***             |
| $\Delta$ SM (%)   | High-connectivity low-gradient hillslope (10 cm)  | 15 $\pm$ 7.2    | 6.5 $\pm$ 5.5   | ***             |
|                   | High-connectivity high-gradient hillslope (10 cm) | 20.2 $\pm$ 10.9 | 5.2 $\pm$ 6.9   | ***             |
|                   | High-connectivity upslope-edge terrace 1 (10 cm)  | 5.2 $\pm$ 2.1   | 4.7 $\pm$ 3.9   | Not significant |
|                   | High-connectivity upslope-edge terrace 2 (10 cm)  | 12.5 $\pm$ 6    | 6.1 $\pm$ 7     | **              |
|                   | Low-connectivity mid-terrace (10 cm)              | 11.3 $\pm$ 3.5  | 6.1 $\pm$ 6.3   | *               |
|                   | Collapsed wall-adjacent terrace (10 cm)           | 8.5 $\pm$ 6.2   | 2.1 $\pm$ 2.6   | ***             |
|                   | Collapsed wall-adjacent terrace (50 cm)           | 8.1 $\pm$ 3.3   | 3.4 $\pm$ 4.8   | **              |
|                   | Intact wall-adjacent terrace (10 cm)              | 9.1 $\pm$ 1.7   | 4.4 $\pm$ 4.3   | **              |

|  |                                      |               |               |     |
|--|--------------------------------------|---------------|---------------|-----|
|  | Intact wall-adjacent terrace (50 cm) | $8.2 \pm 2.9$ | $2.4 \pm 3.5$ | *** |
|  | Disconnected mid-terrace (10 cm)     | $2.1 \pm 1.9$ | $1 \pm 1.4$   | *   |
|  | Disconnected mid-terrace (50 cm)     | $6.9 \pm 6.1$ | $1.8 \pm 3.6$ | *** |
