# Supplementary material
Source: Copernicus journal article supplement (doi:10.5194/egusphere-2026-2711)
Supplement: Supplementary file 2 [file supplementarytable2.pdf › supplementarytable2.pdf]

**Supplementary table 2. Event-scale SM metrics at each location and depth during the drying-down period, comparing flood events and non-flow events. Data are presented as mean  $\pm$  standard deviation. Significance is indicated as follows: \*\*\* $p < 0.001$ , \*\* $p < 0.01$ , \* $p < 0.05$ . “Not significant” indicates  $p \geq 0.05$ .**

| Metric            | Location                                          | Flood events    | Non-flow events | Significance    |
|-------------------|---------------------------------------------------|-----------------|-----------------|-----------------|
| Antecedent SM (%) | High-connectivity low-gradient hillslope (10 cm)  | 17.3 $\pm$ 2    | 19 $\pm$ 2.7    | Not significant |
|                   | High-connectivity high-gradient hillslope (10 cm) | 8.7 $\pm$ 1.2   | 10.1 $\pm$ 2.3  | Not significant |
|                   | High-connectivity upslope-edge terrace 1 (10 cm)  | 30.3 $\pm$ 2.8  | 32.3 $\pm$ 4.2  | Not significant |
|                   | High-connectivity upslope-edge terrace 2 (10 cm)  | 18.3 $\pm$ 1.9  | 21.3 $\pm$ 2.9  | Not significant |
|                   | Low-connectivity mid-terrace (10 cm)              | 23.1 $\pm$ 2.3  | 25.1 $\pm$ 3.2  | Not significant |
|                   | Collapsed wall-adjacent terrace (10 cm)           | 16.1 $\pm$ 1.5  | 16.5 $\pm$ 1.9  | Not significant |
|                   | Collapsed wall-adjacent terrace (50 cm)           | 24 $\pm$ 3.1    | 24.8 $\pm$ 3    | Not significant |
|                   | Intact wall-adjacent terrace (10 cm)              | 16.6 $\pm$ 2.2  | 17.7 $\pm$ 2.4  | Not significant |
|                   | Intact wall-adjacent terrace (50 cm)              | 21.1 $\pm$ 3    | 22.7 $\pm$ 3.7  | Not significant |
|                   | Disconnected mid-terrace (10 cm)                  | 16 $\pm$ 1.8    | 16.4 $\pm$ 1.4  | Not significant |
|                   | Disconnected mid-terrace (50 cm)                  | 19.6 $\pm$ 3.2  | 21.1 $\pm$ 2.5  | Not significant |
| Average SM (%)    | High-connectivity low-gradient hillslope (10 cm)  | 26.7 $\pm$ 2.8  | 19.6 $\pm$ 2.8  | **              |
|                   | High-connectivity high-gradient hillslope (10 cm) | 17.9 $\pm$ 3.5  | 10.6 $\pm$ 2.5  | *               |
|                   | High-connectivity upslope-edge terrace 1 (10 cm)  | 41 $\pm$ 3      | 33 $\pm$ 4.3    | **              |
|                   | High-connectivity upslope-edge terrace 2 (10 cm)  | 32.2 $\pm$ 4.8  | 21.7 $\pm$ 3.1  | *               |
|                   | Low-connectivity mid-terrace (10 cm)              | 33.6 $\pm$ 2.2  | 25.4 $\pm$ 3.2  | **              |
|                   | Collapsed wall-adjacent terrace (10 cm)           | 21.1 $\pm$ 1.7  | 16.5 $\pm$ 1.9  | **              |
|                   | Collapsed wall-adjacent terrace (50 cm)           | 34.2 $\pm$ 3.6  | 25 $\pm$ 3.2    | **              |
|                   | Intact wall-adjacent terrace (10 cm)              | 25.3 $\pm$ 2.5  | 17.8 $\pm$ 2.6  | **              |
|                   | Intact wall-adjacent terrace (50 cm)              | 29 $\pm$ 3.8    | 22.6 $\pm$ 3.7  | *               |
|                   | Disconnected mid-terrace (10 cm)                  | 18.7 $\pm$ 2.5  | 16.4 $\pm$ 1.4  | Not significant |
|                   | Disconnected mid-terrace (50 cm)                  | 26.5 $\pm$ 5.1  | 21.1 $\pm$ 2.5  | *               |
| Maximum SM (%)    | High-connectivity low-gradient hillslope (10 cm)  | 37.1 $\pm$ 3.9  | 22.3 $\pm$ 5    | **              |
|                   | High-connectivity high-gradient hillslope (10 cm) | 36.8 $\pm$ 13   | 12.2 $\pm$ 4.6  | **              |
|                   | High-connectivity upslope-edge terrace 1 (10 cm)  | 47.8 $\pm$ 1.6  | 36.5 $\pm$ 6.9  | ***             |
|                   | High-connectivity upslope-edge terrace 2 (10 cm)  | 42.4 $\pm$ 4.3  | 24.1 $\pm$ 5.8  | **              |
|                   | Low-connectivity mid-terrace (10 cm)              | 44.5 $\pm$ 1.8  | 26.6 $\pm$ 4.1  | **              |
|                   | Collapsed wall-adjacent terrace (10 cm)           | 26.1 $\pm$ 2.4  | 16.7 $\pm$ 2.2  | **              |
|                   | Collapsed wall-adjacent terrace (50 cm)           | 40.2 $\pm$ 0.3  | 25.6 $\pm$ 4    | **              |
|                   | Intact wall-adjacent terrace (10 cm)              | 33 $\pm$ 1.4    | 18.8 $\pm$ 3.8  | **              |
|                   | Intact wall-adjacent terrace (50 cm)              | 39.4 $\pm$ 3.6  | 22.7 $\pm$ 3.7  | **              |
|                   | Disconnected mid-terrace (10 cm)                  | 22.2 $\pm$ 2.9  | 16.5 $\pm$ 1.5  | **              |
|                   | Disconnected mid-terrace (50 cm)                  | 36.4 $\pm$ 6.2  | 21.3 $\pm$ 2.6  | **              |
| $\Delta$ SM (%)   | High-connectivity low-gradient hillslope (10 cm)  | 19.8 $\pm$ 5    | 3.5 $\pm$ 4.8   | **              |
|                   | High-connectivity high-gradient hillslope (10 cm) | 28.1 $\pm$ 12.8 | 2.3 $\pm$ 4.3   | **              |
|                   | High-connectivity upslope-edge terrace 1 (10 cm)  | 17.7 $\pm$ 4.1  | 4.4 $\pm$ 6.9   | *               |
|                   | High-connectivity upslope-edge terrace 2 (10 cm)  | 19 $\pm$ 11.5   | 2.9 $\pm$ 5.1   | *               |
|                   | Low-connectivity mid-terrace (10 cm)              | 21.5 $\pm$ 2.8  | 1.6 $\pm$ 3.3   | **              |
|                   | Collapsed wall-adjacent terrace (10 cm)           | 10.1 $\pm$ 3.5  | 0.3 $\pm$ 0.8   | **              |
|                   | Collapsed wall-adjacent terrace (50 cm)           | 13.3 $\pm$ 7    | 0.8 $\pm$ 1.9   | **              |
|                   | Intact wall-adjacent terrace (10 cm)              | 16.4 $\pm$ 3.3  | 1.2 $\pm$ 2.9   | **              |

---

|                                      |                |               |                 |
|--------------------------------------|----------------|---------------|-----------------|
| Intact wall-adjacent terrace (50 cm) | $18.4 \pm 4.1$ | $0.2 \pm 0.2$ | **              |
| Disconnected mid-terrace (10 cm)     | $6.2 \pm 4.5$  | $0.2 \pm 0.1$ | Not significant |
| Disconnected mid-terrace (50 cm)     | $16.9 \pm 6.7$ | $0.3 \pm 0.8$ | **              |

---
