# Supplementary material
Source: Copernicus journal article supplement (doi:10.5194/egusphere-2026-2711)
Supplement: Supplementary file 3 [file supplementarytable3.pdf › supplementarytable3.pdf]

**Supplementary table 3. Event-scale SM metrics at each location and depth during the wetting-up period, comparing flood events and non-flow events. Data are presented as mean  $\pm$  standard deviation. Significance is indicated as follows: \*\*\* $p < 0.001$ , \*\* $p < 0.01$ , \* $p < 0.05$ . “Not significant” indicates  $p \geq 0.05$ .**

| Metric                           | Location                                          | Flood events    | Non-flow events | Significance    |
|----------------------------------|---------------------------------------------------|-----------------|-----------------|-----------------|
| <b>Antecedent SM (%)</b>         | High-connectivity low-gradient hillslope (10 cm)  | 19.6 $\pm$ 5    | 19.7 $\pm$ 4.2  | Not significant |
|                                  | High-connectivity high-gradient hillslope (10 cm) | 11.6 $\pm$ 2.3  | 11.1 $\pm$ 3    | Not significant |
|                                  | High-connectivity upslope-edge terrace 1 (10 cm)  | 33.2 $\pm$ 6.7  | 32.8 $\pm$ 5.7  | Not significant |
|                                  | High-connectivity upslope-edge terrace 2 (10 cm)  | 24.6 $\pm$ 5.3  | 23.4 $\pm$ 5.9  | Not significant |
|                                  | Low-connectivity mid-terrace (10 cm)              | 25.4 $\pm$ 6.1  | 25.7 $\pm$ 4.8  | Not significant |
|                                  | Collapsed wall-adjacent terrace (10 cm)           | 17.3 $\pm$ 3    | 17.6 $\pm$ 2.7  | Not significant |
|                                  | Collapsed wall-adjacent terrace (50 cm)           | 24.5 $\pm$ 4.4  | 25.6 $\pm$ 3.6  | Not significant |
|                                  | Intact wall-adjacent terrace (10 cm)              | 21.1 $\pm$ 4    | 20.2 $\pm$ 4.8  | Not significant |
|                                  | Intact wall-adjacent terrace (50 cm)              | 23.1 $\pm$ 4.8  | 23.7 $\pm$ 4.7  | Not significant |
|                                  | Disconnected mid-terrace (10 cm)                  | 13.7 $\pm$ 1.2  | 15.2 $\pm$ 2.3  | Not significant |
|                                  | Disconnected mid-terrace (50 cm)                  | 18.4 $\pm$ 4.7  | 19.9 $\pm$ 4.3  | Not significant |
| <b>Average SM (%)</b>            | High-connectivity low-gradient hillslope (10 cm)  | 27.2 $\pm$ 3.9  | 22.5 $\pm$ 4.1  | *               |
|                                  | High-connectivity high-gradient hillslope (10 cm) | 18.2 $\pm$ 3.1  | 14 $\pm$ 3.3    | *               |
|                                  | High-connectivity upslope-edge terrace 1 (10 cm)  | 42.6 $\pm$ 3.6  | 37.5 $\pm$ 5.2  | *               |
|                                  | High-connectivity upslope-edge terrace 2 (10 cm)  | 33.4 $\pm$ 3.4  | 26.5 $\pm$ 5.8  | *               |
|                                  | Low-connectivity mid-terrace (10 cm)              | 34.7 $\pm$ 3.5  | 28 $\pm$ 5      | **              |
|                                  | Collapsed wall-adjacent terrace (10 cm)           | 22.9 $\pm$ 1.8  | 18.4 $\pm$ 2.9  | **              |
|                                  | Collapsed wall-adjacent terrace (50 cm)           | 33.9 $\pm$ 2    | 26.9 $\pm$ 4.2  | ***             |
|                                  | Intact wall-adjacent terrace (10 cm)              | 27.5 $\pm$ 3.5  | 22.7 $\pm$ 4.9  | *               |
|                                  | Intact wall-adjacent terrace (50 cm)              | 31.1 $\pm$ 2.6  | 25.4 $\pm$ 5.2  | **              |
|                                  | Disconnected mid-terrace (10 cm)                  | 16.1 $\pm$ 3.4  | 15.2 $\pm$ 2.5  | Not significant |
|                                  | Disconnected mid-terrace (50 cm)                  | 25.6 $\pm$ 7    | 20.5 $\pm$ 4.9  | Not significant |
| <b>Maximum SM (%)</b>            | High-connectivity low-gradient hillslope (10 cm)  | 37.6 $\pm$ 7.9  | 25.5 $\pm$ 6    | **              |
|                                  | High-connectivity high-gradient hillslope (10 cm) | 33.4 $\pm$ 8.4  | 17.4 $\pm$ 6.8  | **              |
|                                  | High-connectivity upslope-edge terrace 1 (10 cm)  | 46.7 $\pm$ 2.3  | 41.2 $\pm$ 6.7  | Not significant |
|                                  | High-connectivity upslope-edge terrace 2 (10 cm)  | 43.7 $\pm$ 4.1  | 30.6 $\pm$ 8.5  | **              |
|                                  | Low-connectivity mid-terrace (10 cm)              | 44.2 $\pm$ 4    | 30.3 $\pm$ 6.8  | ***             |
|                                  | Collapsed wall-adjacent terrace (10 cm)           | 30.4 $\pm$ 6.3  | 19.6 $\pm$ 3.5  | ***             |
|                                  | Collapsed wall-adjacent terrace (50 cm)           | 40.1 $\pm$ 1.5  | 28.9 $\pm$ 6.2  | ***             |
|                                  | Intact wall-adjacent terrace (10 cm)              | 34.6 $\pm$ 4.2  | 25.9 $\pm$ 6.4  | *               |
|                                  | Intact wall-adjacent terrace (50 cm)              | 39 $\pm$ 4.4    | 27.2 $\pm$ 6.4  | **              |
|                                  | Disconnected mid-terrace (10 cm)                  | 19.1 $\pm$ 5.6  | 15.5 $\pm$ 2.9  | Not significant |
|                                  | Disconnected mid-terrace (50 cm)                  | 33.5 $\pm$ 11.7 | 21.2 $\pm$ 6.1  | *               |
| <b><math>\Delta</math>SM (%)</b> | High-connectivity low-gradient hillslope (10 cm)  | 18 $\pm$ 6.6    | 5.6 $\pm$ 6.4   | **              |
|                                  | High-connectivity high-gradient hillslope (10 cm) | 20.9 $\pm$ 8.4  | 6.2 $\pm$ 8     | **              |
|                                  | High-connectivity upslope-edge terrace 1 (10 cm)  | 12.7 $\pm$ 6.5  | 8.2 $\pm$ 8.6   | Not significant |
|                                  | High-connectivity upslope-edge terrace 2 (10 cm)  | 17.8 $\pm$ 5.2  | 7 $\pm$ 9       | *               |
|                                  | Low-connectivity mid-terrace (10 cm)              | 18.2 $\pm$ 4.8  | 4.6 $\pm$ 6.3   | **              |
|                                  | Collapsed wall-adjacent terrace (10 cm)           | 13 $\pm$ 5.5    | 2.2 $\pm$ 2.9   | ***             |
|                                  | Collapsed wall-adjacent terrace (50 cm)           | 15.6 $\pm$ 3.7  | 3.3 $\pm$ 5.7   | **              |
|                                  | Intact wall-adjacent terrace (10 cm)              | 13.5 $\pm$ 3.2  | 5.7 $\pm$ 6.7   | *               |

|  |                                      |            |           |    |
|--|--------------------------------------|------------|-----------|----|
|  | Intact wall-adjacent terrace (50 cm) | 16.1 ± 4.4 | 3.8 ± 5.9 | ** |
|  | Disconnected mid-terrace (10 cm)     | 5.5 ± 5.2  | 0.6 ± 1.2 | *  |
|  | Disconnected mid-terrace (50 cm)     | 15.2 ± 10  | 1.4 ± 4.7 | ** |
